# Supplementary material
Source: HighWire-hosted journal article supplement (https://cmaj.ca/highwire/filestream/71112/field_highwire_adjunct_files/3/180175-res-4-at.pdf)
Supplement: 180175-res-4-at.pdf [file 180175-res-4-at.pdf]

| <b>Appendix 4 (as supplied by the authors): Odds ratios from adjusted logistic regression of factors affecting utilization of pain interventions</b> |                   |                                |      |
|------------------------------------------------------------------------------------------------------------------------------------------------------|-------------------|--------------------------------|------|
| <b>Variable</b>                                                                                                                                      | <b>Odds ratio</b> | <b>95% Confidence interval</b> |      |
| <b>Grouping variable</b>                                                                                                                             |                   |                                |      |
| Group, 2 (pain pamphlet) vs. 1 (control)                                                                                                             | 1.39              | 1.13                           | 1.71 |
| Group, 3 (pain pamphlet and pain video) vs. 1 (control)                                                                                              | 1.39              | 1.13                           | 1.72 |
| Group 3 (pain pamphlet and pain video) vs. 2 (pain pamphlet)                                                                                         | 1.00              | 0.81                           | 1.23 |
| <b>Other variables</b>                                                                                                                               |                   |                                |      |
| Attitude, Mother confident, 0 (no) vs. 1 (yes)                                                                                                       | 0.89              | 0.74                           | 1.06 |
| Attitude, Mother less anxious, 0 (no) vs. 1 (yes)                                                                                                    | 0.77              | 0.65                           | 0.92 |
| Attitude, Pain is important, 0 (no) vs. 1 (yes)                                                                                                      | 0.76              | 0.60                           | 0.96 |
| Father present at education, 0 (no) vs. 1 (yes)                                                                                                      | 0.97              | 0.81                           | 1.17 |
| Follow-up date, 2 (4 months) vs. 1 (2 months)                                                                                                        | 0.95              | 0.77                           | 1.17 |
| Follow-up date, 3 (6 months) vs. 1 (2 months)                                                                                                        | 0.70              | 0.57                           | 0.87 |
| Follow-up date, 3 (6 months) vs. 2 (4 months)                                                                                                        | 0.74              | 0.60                           | 0.91 |
| Infant gestational age, continuous                                                                                                                   | 1.01              | 1.00                           | 1.02 |
| Infant postnatal age, continuous                                                                                                                     | 0.99              | 0.87                           | 1.12 |
| Knowledge, continuous (0-3)                                                                                                                          | 1.32              | 1.20                           | 1.44 |
| Maternal age, continuous                                                                                                                             | 1.02              | 1.00                           | 1.04 |
| Marital status, 0 (single) vs. 1 (married/common law)                                                                                                | 1.0               | 0.63                           | 1.63 |
| Mode of delivery, 0 (c-section) vs. 1 (vaginal)                                                                                                      | 0.64              | 0.53                           | 0.77 |
| Maternal education, 0 (K-12*) vs. 1 (post-secondary)                                                                                                 | 0.56              | 0.38                           | 0.85 |
| Multipara, 0 (no) vs. 1 (yes)                                                                                                                        | 0.69              | 0.57                           | 0.83 |
| Singleton birth, 0 (no) vs. 1 (yes)                                                                                                                  | 0.48              | 0.22                           | 1.02 |
| * K-12 = Kindergarten to Grade 12                                                                                                                    |                   |                                |      |
